# Supplementary material
Source: PubMed Central journal article supplement (PMC8628317)
Supplement: NIHMS1755289-supplement-Supporting_Material.pdf [file NIHMS1755289-supplement-Supporting_Material.pdf]

Table S2. Percent identity matrix for human TRP channels from the same multiple sequence alignment described in Table S1. In this case, the color intensity from white to red illustrates increasing sequence conservation.

|        | TRPM1 | TRPM3 | TRPM6 | TRPM7 | TRPM4 | TRPM5 | TRPM8 | TRPM2 | TRPC6 | TRPC3 | TRPC7 | TRPC1 | TRPC4 | TRPC5 | TRPA1 | TRPN1 | TRPV5 | TRPV6 | TRPV3 | TRPV4 | TRPV1 | TRPV2 | TRPML1 | TRPML2 | TRPML3 | TRPP5 | TRPP2 | TRPP3 |
|--------|-------|-------|-------|-------|-------|-------|-------|-------|-------|-------|-------|-------|-------|-------|-------|-------|-------|-------|-------|-------|-------|-------|--------|--------|--------|-------|-------|-------|
| TRPM1  | 100.0 | 64.6  | 47.1  | 49.5  | 30.1  | 29.4  | 29.2  | 31.3  | 19.4  | 17.6  | 17.8  | 17.0  | 17.9  | 16.7  | 12.7  | 15.6  | 14.6  | 13.3  | 15.4  | 13.4  | 14.5  | 16.0  | 8.9    | 9.3    | 8.8    | 12.4  | 14.0  | 14.4  |
| TRPM3  | 64.6  | 100.0 | 48.2  | 53.5  | 29.8  | 29.4  | 29.9  | 30.7  | 18.7  | 16.5  | 17.8  | 17.2  | 17.7  | 17.8  | 13.1  | 15.0  | 14.5  | 12.9  | 15.4  | 13.4  | 15.6  | 16.5  | 8.6    | 9.4    | 8.3    | 12.4  | 13.3  | 12.6  |
| TRPM6  | 47.1  | 48.2  | 100.0 | 57.1  | 28.3  | 28.3  | 26.7  | 28.4  | 19.5  | 17.7  | 18.8  | 15.8  | 18.6  | 17.1  | 12.6  | 14.2  | 13.2  | 12.8  | 15.3  | 12.3  | 13.0  | 14.6  | 9.9    | 8.7    | 9.1    | 11.6  | 12.9  | 12.0  |
| TRPM7  | 49.5  | 53.5  | 57.1  | 100.0 | 28.3  | 26.9  | 28.3  | 29.5  | 18.8  | 16.3  | 17.3  | 16.0  | 17.4  | 17.4  | 11.9  | 14.7  | 13.0  | 12.3  | 13.5  | 11.9  | 13.0  | 15.0  | 11.0   | 9.6    | 10.5   | 12.3  | 12.5  | 11.1  |
| TRPM4  | 30.1  | 29.8  | 28.3  | 28.3  | 100.0 | 46.4  | 34.0  | 37.7  | 18.3  | 18.6  | 17.9  | 17.8  | 19.6  | 18.8  | 13.0  | 16.4  | 13.2  | 13.8  | 15.2  | 13.8  | 13.8  | 14.8  | 10.2   | 8.3    | 10.0   | 10.6  | 14.3  | 11.1  |
| TRPM5  | 29.4  | 29.4  | 28.3  | 26.9  | 46.4  | 100.0 | 35.6  | 39.5  | 18.3  | 17.9  | 17.9  | 16.4  | 19.3  | 19.1  | 12.8  | 15.6  | 13.2  | 12.7  | 14.0  | 14.8  | 12.9  | 14.0  | 10.0   | 8.3    | 10.8   | 10.9  | 11.7  | 11.7  |
| TRPM8  | 29.2  | 29.9  | 26.7  | 28.3  | 34.0  | 35.6  | 100.0 | 42.6  | 18.0  | 18.3  | 18.0  | 17.5  | 20.3  | 19.3  | 13.6  | 15.0  | 12.7  | 13.1  | 14.3  | 13.6  | 14.3  | 15.7  | 10.2   | 8.0    | 9.7    | 11.9  | 14.3  | 12.5  |
| TRPM2  | 31.3  | 30.7  | 28.4  | 29.5  | 37.7  | 39.5  | 42.6  | 100.0 | 21.2  | 20.8  | 20.8  | 19.9  | 18.6  | 19.2  | 12.7  | 16.4  | 12.8  | 11.7  | 14.1  | 13.3  | 12.3  | 14.4  | 9.5    | 8.1    | 8.8    | 11.2  | 12.9  | 13.4  |
| TRPC6  | 19.4  | 18.7  | 19.5  | 18.8  | 18.3  | 18.3  | 18.0  | 21.2  | 100.0 | 74.7  | 74.9  | 36.2  | 40.8  | 39.5  | 16.2  | 21.7  | 13.5  | 14.0  | 14.0  | 14.6  | 14.2  | 14.9  | 11.5   | 12.1   | 12.9   | 17.4  | 16.7  | 17.2  |
| TRPC3  | 17.6  | 16.5  | 17.7  | 16.3  | 18.6  | 17.9  | 18.3  | 20.8  | 74.7  | 100.0 | 81.4  | 35.7  | 42.0  | 42.1  | 15.0  | 22.8  | 13.1  | 13.1  | 14.5  | 14.4  | 14.4  | 14.5  | 12.7   | 12.9   | 13.5   | 16.5  | 15.1  | 17.7  |
| TRPC7  | 17.8  | 17.8  | 18.8  | 17.3  | 17.9  | 17.9  | 18.0  | 20.8  | 74.9  | 81.4  | 100.0 | 34.8  | 41.6  | 40.5  | 14.4  | 21.1  | 12.8  | 13.0  | 14.0  | 14.3  | 13.9  | 14.0  | 12.0   | 12.3   | 13.4   | 16.3  | 16.5  | 17.8  |
| TRPC1  | 17.0  | 17.2  | 15.8  | 16.0  | 17.8  | 16.4  | 17.5  | 19.9  | 36.2  | 35.7  | 34.8  | 100.0 | 46.5  | 45.5  | 12.2  | 20.2  | 12.8  | 13.5  | 14.1  | 12.4  | 14.3  | 13.6  | 11.5   | 11.7   | 10.4   | 10.9  | 10.0  | 11.9  |
| TRPC4  | 17.9  | 17.7  | 18.6  | 17.4  | 19.6  | 19.3  | 20.3  | 18.6  | 40.8  | 42.0  | 41.6  | 46.5  | 100.0 | 68.3  | 15.1  | 21.7  | 16.2  | 16.4  | 16.3  | 14.4  | 16.6  | 16.0  | 12.8   | 10.9   | 11.7   | 13.4  | 13.5  | 15.9  |
| TRPC5  | 16.7  | 17.8  | 17.1  | 17.4  | 18.8  | 19.1  | 19.3  | 19.2  | 39.5  | 42.1  | 40.5  | 45.5  | 68.3  | 100.0 | 13.5  | 21.6  | 15.0  | 15.2  | 16.5  | 14.4  | 16.0  | 16.3  | 13.0   | 12.5   | 11.9   | 12.7  | 13.5  | 15.1  |
| TRPA1  | 12.7  | 13.1  | 12.6  | 11.9  | 13.0  | 12.8  | 13.6  | 12.7  | 16.2  | 15.0  | 14.4  | 12.2  | 15.1  | 13.5  | 100.0 | 22.9  | 18.2  | 19.2  | 18.5  | 18.5  | 18.4  | 18.2  | 15.7   | 13.6   | 14.7   | 16.7  | 16.4  | 15.8  |
| TRPN1  | 15.6  | 15.0  | 14.2  | 14.7  | 16.4  | 15.6  | 15.0  | 16.4  | 21.7  | 22.8  | 21.1  | 20.2  | 21.7  | 21.6  | 22.9  | 100.0 | 20.3  | 19.7  | 19.2  | 18.5  | 20.0  | 20.4  | 12.4   | 12.7   | 13.0   | 15.1  | 14.1  | 13.1  |
| TRPV5  | 14.6  | 14.5  | 13.2  | 13.0  | 13.2  | 13.2  | 12.7  | 12.8  | 13.5  | 13.1  | 12.8  | 12.8  | 16.2  | 15.0  | 18.2  | 20.3  | 100.0 | 74.7  | 28.3  | 29.5  | 28.2  | 27.5  | 15.1   | 15.6   | 16.5   | 13.4  | 15.4  | 14.6  |
| TRPV6  | 13.3  | 12.9  | 12.8  | 12.3  | 13.8  | 12.7  | 13.1  | 11.7  | 14.0  | 13.1  | 13.0  | 13.5  | 16.4  | 15.2  | 19.2  | 19.7  | 74.7  | 100.0 | 27.8  | 29.4  | 28.4  | 28.0  | 15.6   | 15.4   | 16.5   | 13.5  | 14.3  | 13.7  |
| TRPV3  | 15.4  | 15.4  | 15.3  | 13.5  | 15.2  | 14.0  | 14.3  | 14.1  | 14.0  | 14.5  | 14.0  | 14.1  | 16.3  | 16.5  | 18.5  | 19.2  | 28.3  | 27.8  | 100.0 | 41.5  | 41.9  | 38.2  | 13.7   | 14.4   | 13.5   | 13.8  | 14.4  | 15.7  |
| TRPV4  | 13.4  | 13.4  | 12.3  | 11.9  | 13.8  | 14.8  | 13.6  | 13.3  | 14.6  | 14.4  | 14.3  | 12.4  | 14.4  | 14.4  | 18.5  | 18.5  | 29.5  | 29.4  | 41.5  | 100.0 | 45.6  | 43.2  | 13.7   | 14.4   | 14.6   | 16.9  | 15.8  | 17.0  |
| TRPV1  | 14.5  | 15.6  | 13.0  | 13.0  | 13.8  | 12.9  | 14.3  | 12.3  | 14.2  | 14.4  | 13.9  | 14.3  | 16.6  | 16.0  | 18.4  | 20.0  | 28.2  | 28.4  | 41.9  | 45.6  | 100.0 | 46.8  | 14.3   | 13.7   | 13.0   | 13.1  | 13.4  | 13.5  |
| TRPV2  | 16.0  | 16.5  | 14.6  | 15.0  | 14.8  | 14.0  | 15.7  | 14.4  | 14.9  | 14.5  | 14.0  | 13.6  | 16.0  | 16.3  | 18.2  | 20.4  | 27.5  | 28.0  | 38.2  | 43.2  | 46.8  | 100.0 | 16.1   | 16.0   | 15.6   | 11.2  | 12.7  | 14.0  |
| TRPML1 | 8.9   | 8.6   | 9.9   | 11.0  | 10.2  | 10.0  | 10.2  | 9.5   | 11.5  | 12.7  | 12.0  | 11.5  | 12.8  | 13.0  | 15.7  | 12.4  | 15.1  | 15.6  | 13.7  | 13.7  | 14.3  | 16.1  | 100.0  | 48.7   | 56.4   | 17.6  | 17.9  | 18.9  |
| TRPML2 | 9.3   | 9.4   | 8.7   | 9.6   | 8.3   | 8.3   | 8.0   | 8.1   | 12.1  | 12.9  | 12.3  | 11.7  | 10.9  | 12.5  | 13.6  | 12.7  | 15.6  | 15.4  | 14.4  | 14.4  | 13.7  | 16.0  | 48.7   | 100.0  | 57.1   | 18.0  | 17.1  | 17.6  |
| TRPML3 | 8.8   | 8.3   | 9.1   | 10.5  | 10.0  | 10.8  | 9.7   | 8.8   | 12.9  | 13.5  | 13.4  | 10.4  | 11.7  | 11.9  | 14.7  | 13.0  | 16.5  | 16.5  | 13.5  | 14.6  | 13.0  | 15.6  | 56.4   | 57.1   | 100.0  | 19.2  | 19.6  | 17.3  |
| TRPP5  | 12.4  | 12.4  | 11.6  | 12.3  | 10.6  | 10.9  | 11.9  | 11.2  | 17.4  | 16.5  | 16.3  | 10.9  | 13.4  | 12.7  | 16.7  | 15.1  | 13.4  | 13.5  | 13.8  | 16.9  | 13.1  | 11.2  | 17.6   | 18.0   | 19.2   | 100.0 | 47.0  | 46.9  |
| TRPP2  | 14.0  | 13.3  | 12.9  | 12.5  | 14.3  | 11.7  | 14.3  | 12.9  | 16.7  | 15.1  | 16.5  | 10.0  | 13.5  | 13.5  | 16.4  | 14.1  | 15.4  | 14.3  | 14.4  | 15.8  | 13.4  | 12.7  | 17.9   | 17.1   | 19.6   | 47.0  | 100.0 | 50.8  |
| TRPP3  | 14.4  | 12.6  | 12.0  | 11.1  | 11.1  | 11.7  | 12.5  | 13.4  | 17.2  | 17.7  | 17.8  | 11.9  | 15.9  | 15.1  | 15.8  | 13.1  | 14.6  | 13.7  | 15.7  | 17.0  | 13.5  | 14.0  | 18.9   | 17.6   | 17.3   | 46.9  | 50.8  | 100.0 |

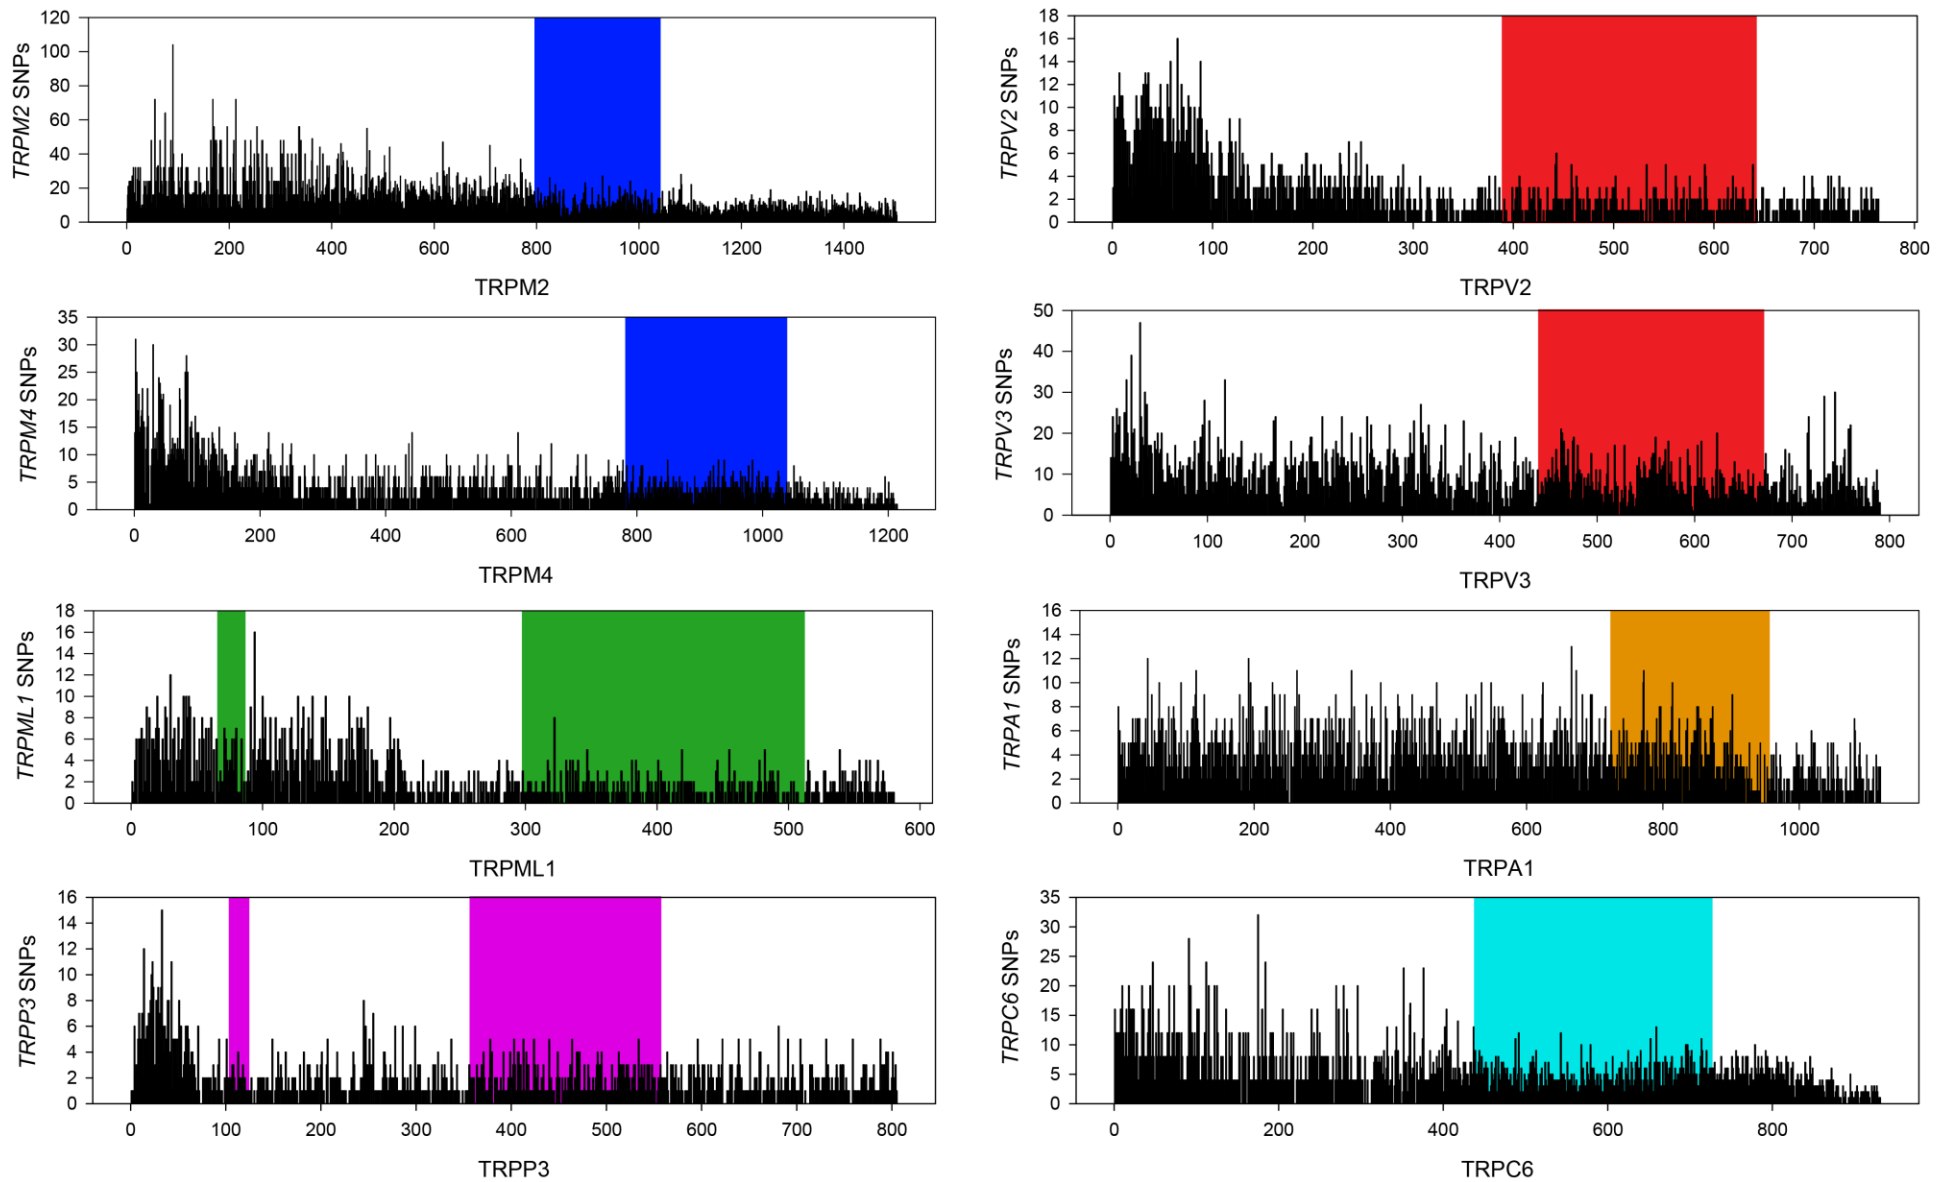

Figure S1. SNP frequencies by residue position in representative TRP channels. Exonic SNP data was downloaded from the Ensembl database (<https://www.ensembl.org>). Raw data was processed in Linux to count unique SNPs at each residue number. Color shading indicates transmembrane regions of the channels and corresponds to the colors of subfamilies shown in Figure 1. Note that TRPML and TRPP channels have an extended extracellular segment between the S1 helix and the rest of the transmembrane region.
